# Supplementary material
Source: MDPI journal article supplement (https://www.mdpi.com/2311-5629/6/4/65)
Supplement: s1 [file s1]

Activated carbons from fast pyrolysis biochar as novel catalysts for the post-treatment of pyrolysis vapors, studied by analytical pyrolysis

Taina Ohra-aho1,*, Christian Lindfors1, Juha Lehtonen1, Tarja Tamminen1 and Virpi Siipola1

1 VTT Technical Research Centre of Finland Ltd, P.O.Box 1000, FI-02044 VTT, Espoo, Finland; [christian.lindfors@vtt.fi](mailto:christian.lindfors@vtt.fi) (C.L.); [juha.lehtonen@vtt.fi](mailto:juha.lehtonen@vtt.fi) (J.L.); [tarja.tamminen@vtt.fi](mailto:tarja.tamminen@vtt.fi) (T.T.); [virpi.siipola@vtt.fi](mailto:virpi.siipola@vtt.fi) (V.S.)

***** Correspondence: [taina.ohra-aho@vtt.fi](mailto:taina.ohra-aho@vtt.fi); Tel.: +358 40 5709 322 (T.O.)

Supporting material


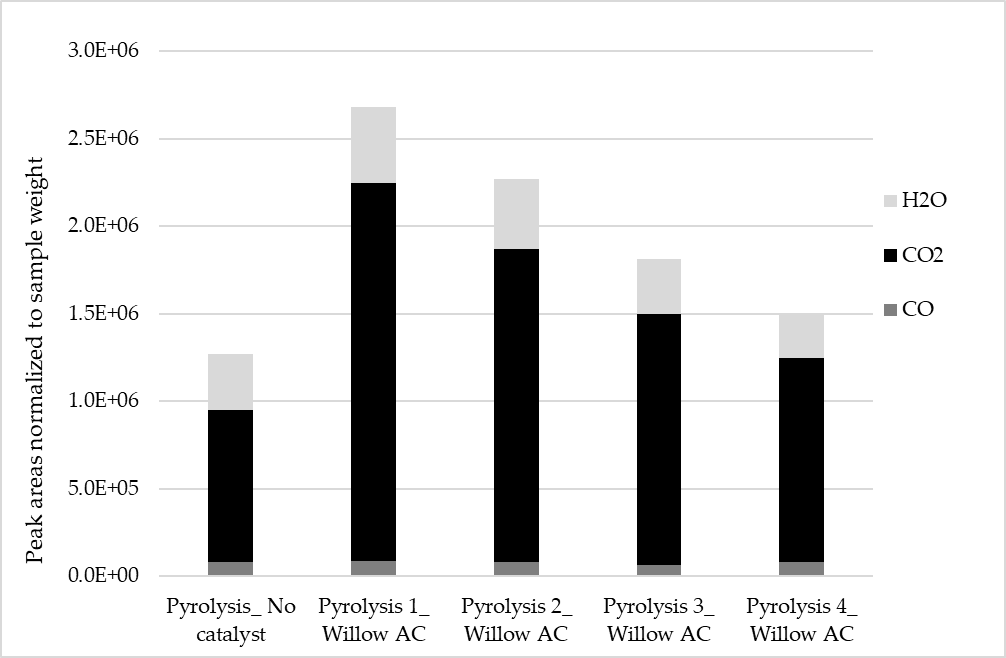


Figure S1. Gas and water release in thermal pyrolysis of pine (pyrolysis_No catalyst) and in post-treatment of pine pyrolysis vapours using four times the same original willow activated carbon (AC) as catalyst. Compounds analysed by GC/MSD.


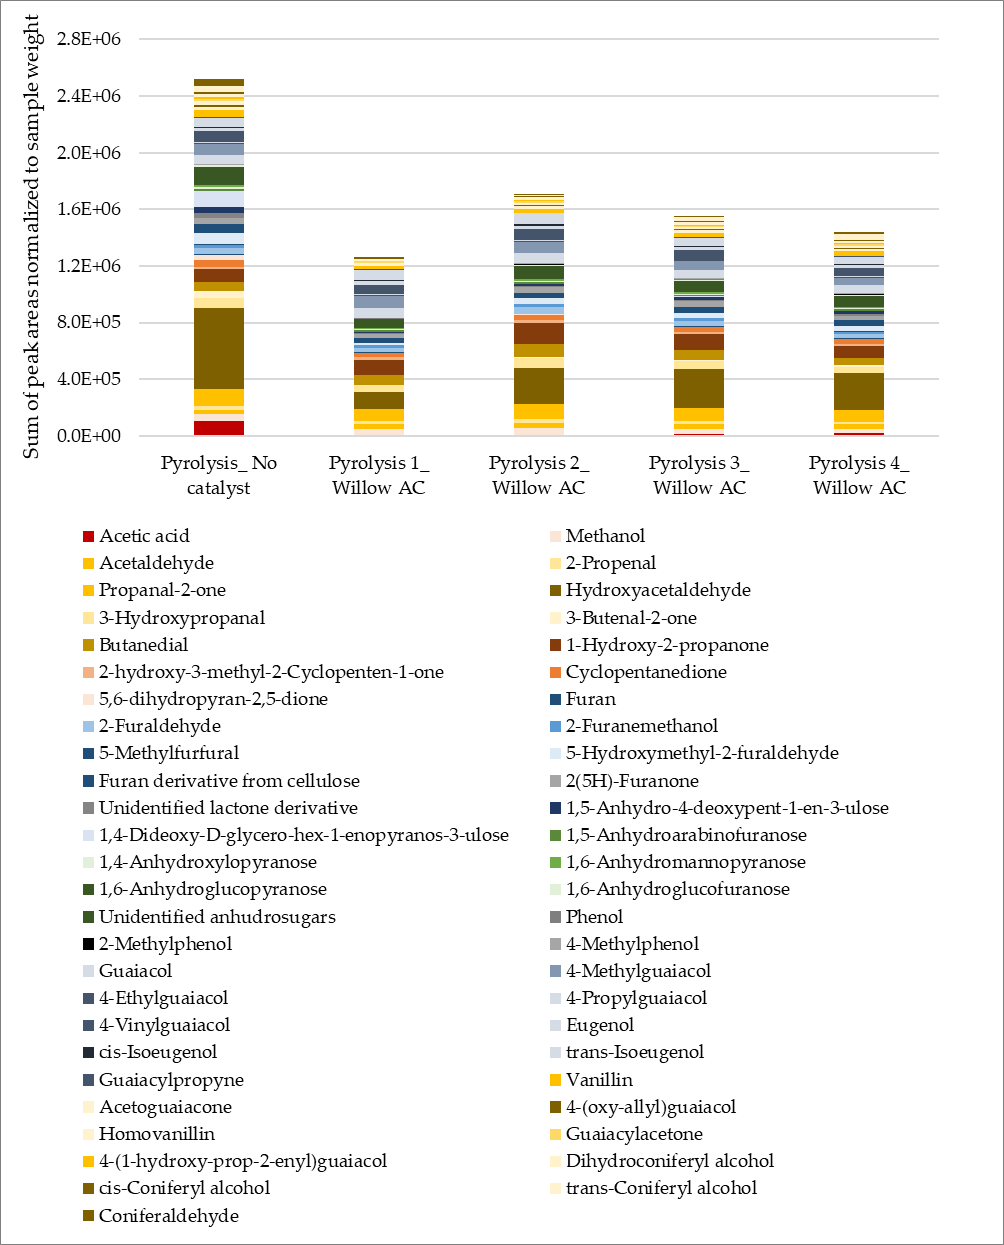


Figure S2. Polysaccharide and lignin pyrolysis derivatives released in thermal pyrolysis pine and in post-treatment of pine pyrolysis vapours using four times the same original willow activated carbon (AC) as catalyst. Compounds analysed by GC-FID.


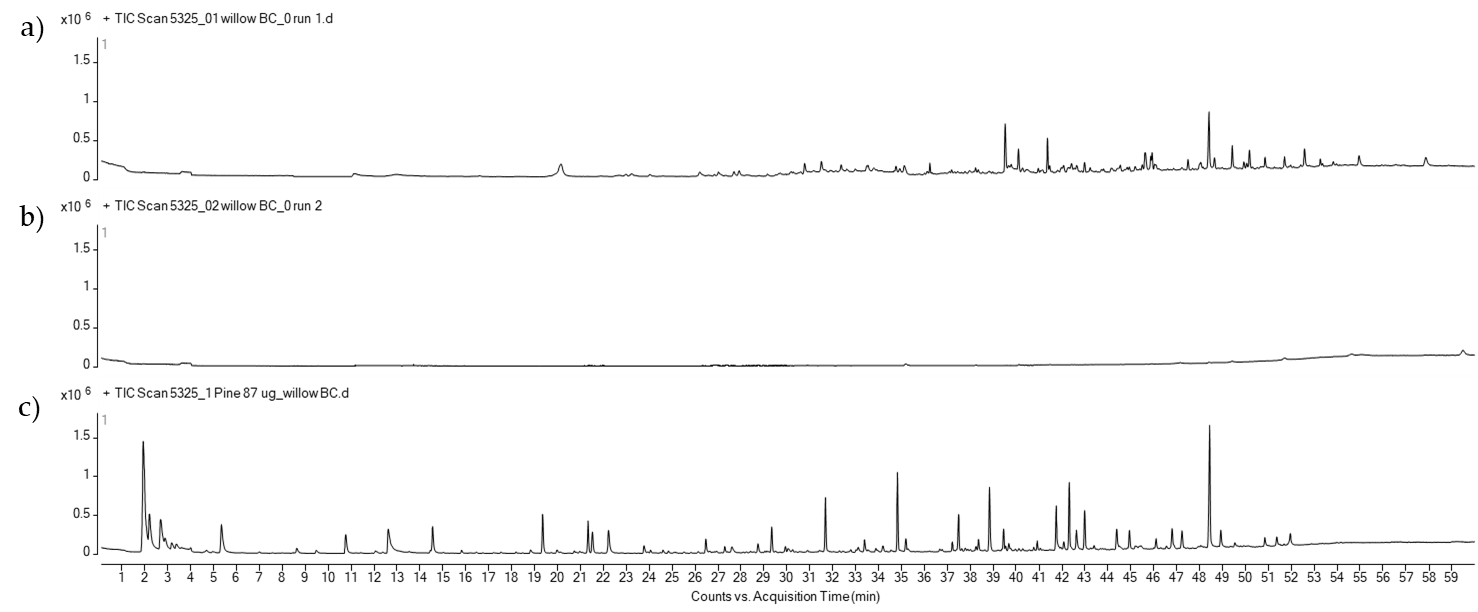


Figure S3. Total ion chromatograms of two pyrolysis runs with willow BC without biomass a) pretreatment 1 and b) pretreatment 2 and c) post-treatment of pine pyrolysis vapours using pretreated willow BC as catalyst.


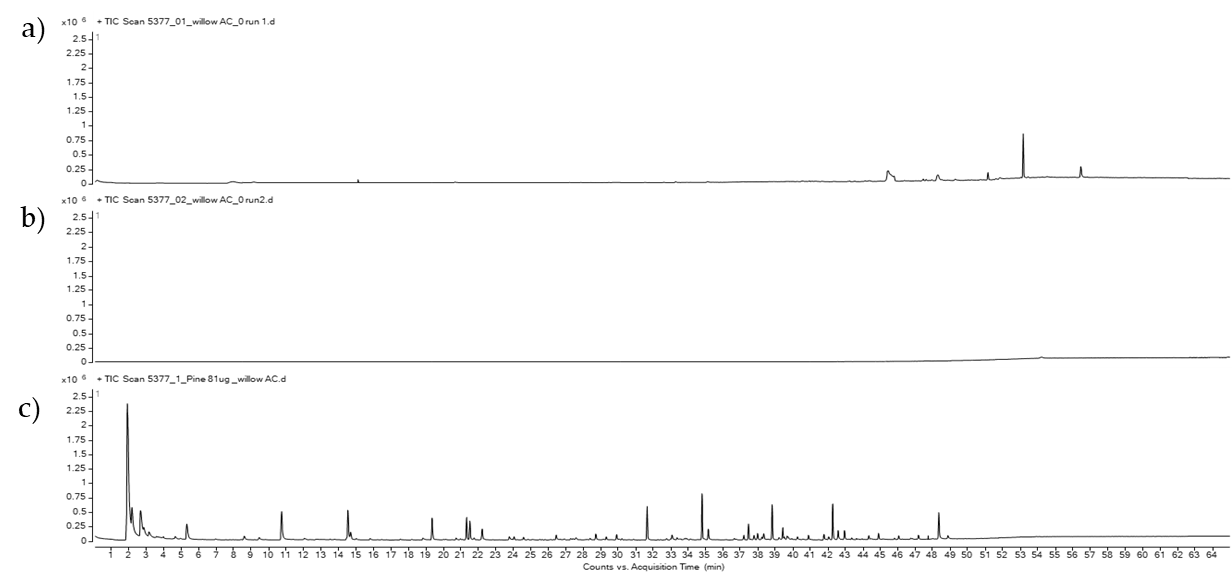


Figure S4. Total ion chromatograms of two pyrolysis runs with willow AC without biomass a) pretreatment 1 and b) pretreatment 2 and c) post-treatment of pine pyrolysis vapours using pretreated willow AC as catalyst.
